# Supplementary material for: Transcriptome analysis of the anhydrobiotic cell line Pv11 infers the mechanism of desiccation tolerance and recovery
Source: PubMed Central journal article supplement (PMC6298976; doi:10.1038/s41598-018-36124-6), 2018-12-18
Supplement: 41598_2018_36124_MOESM1_ESM.pdf [file 41598_2018_36124_MOESM1_ESM.pdf]

# Transcriptome analysis of the anhydrobiotic cell line Pv11 infers the mechanism of desiccation tolerance and recovery

**Takahiro G Yamada<sup>1</sup>, Yoshitaka Suetsugu<sup>2,†</sup>, Ruslan Deviatiiarov<sup>3</sup>, Oleg Gusev<sup>3,4</sup>, Richard Cornette<sup>2</sup>, Alexander Nesmelov<sup>3</sup>, Noriko Hiroi<sup>5</sup>, Takahiro Kikawada<sup>2,6,\*</sup>, and Akira Funahashi<sup>1,\*</sup>**

<sup>1</sup>Department of Biosciences and Informatics, Keio University, Yokohama, Kanagawa, 223-8522, Japan

<sup>2</sup>Institute of Agrobiological Sciences, National Agriculture and Food Research Organization (NARO), Tsukuba, Ibaragi, 305-8634, Japan

<sup>3</sup>Kazan Federal University, Kazan, Tatarstan, 420008, Russia

<sup>4</sup>RIKEN, Yokohama, Kanagawa, 230-0045, Japan

<sup>5</sup>Faculty of Pharmaceutical Science, Sanyo-Onoda City University, Sanyo-Onoda, Yamaguchi, 756-0884, Japan

<sup>6</sup>Graduate School of Frontier Sciences, The University of Tokyo, Kashiwa, Chiba, 277-8562, Japan

\*kikawada@affrc.go.jp and funa@bio.keio.ac.jp

†Deceased

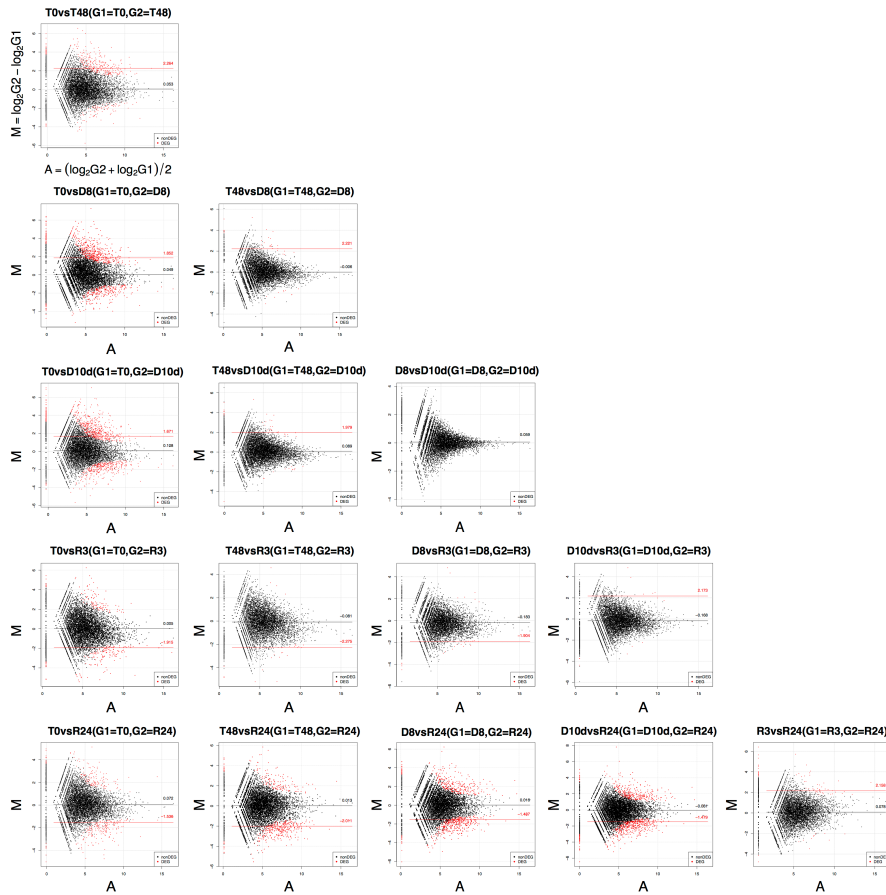

**Supplementary Figure S1.** M-A plots of differentially expressed genes (DEGs) for each pair of samples. The M value indicates the log ratio (sample group 2 (G2) relative to sample group 1 (G1),  $\log_2 G_2 - \log_2 G_1$ ). The A value indicates the average expression of a gene in samples G1 and G2 ( $(\log_2 G_2 + \log_2 G_1)/2$ ). The median M values are indicated by black lines for non-DEGs and red lines for DEGs.

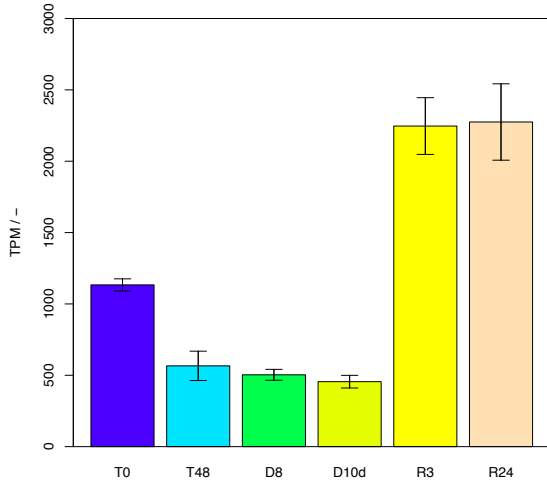

**Pv.01867**

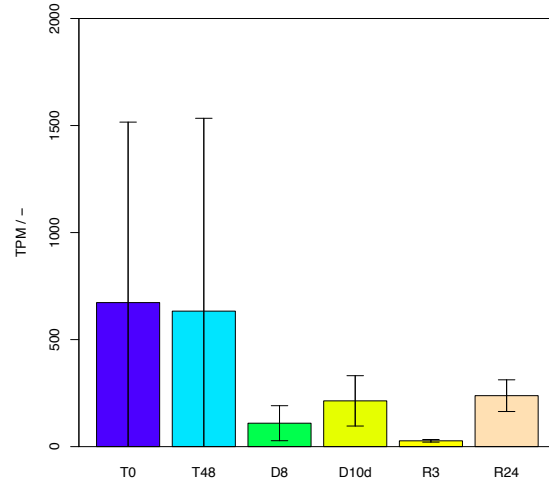

**Pv.04558**

**Supplementary Figure S2.** Expression of Pv.01867 and Pv.04558. Horizontal axis shows sample names. TPM, tags per million. T0, control Pv11 cells. T48, trehalose treatment for 48 h. D8, desiccation for 8 h. D10d, desiccation for 10 days. R3, rehydration of D10d cells for 3 h. R24, rehydration of D10d cells for 24 h. Data are mean  $\pm$  SD, n=3.

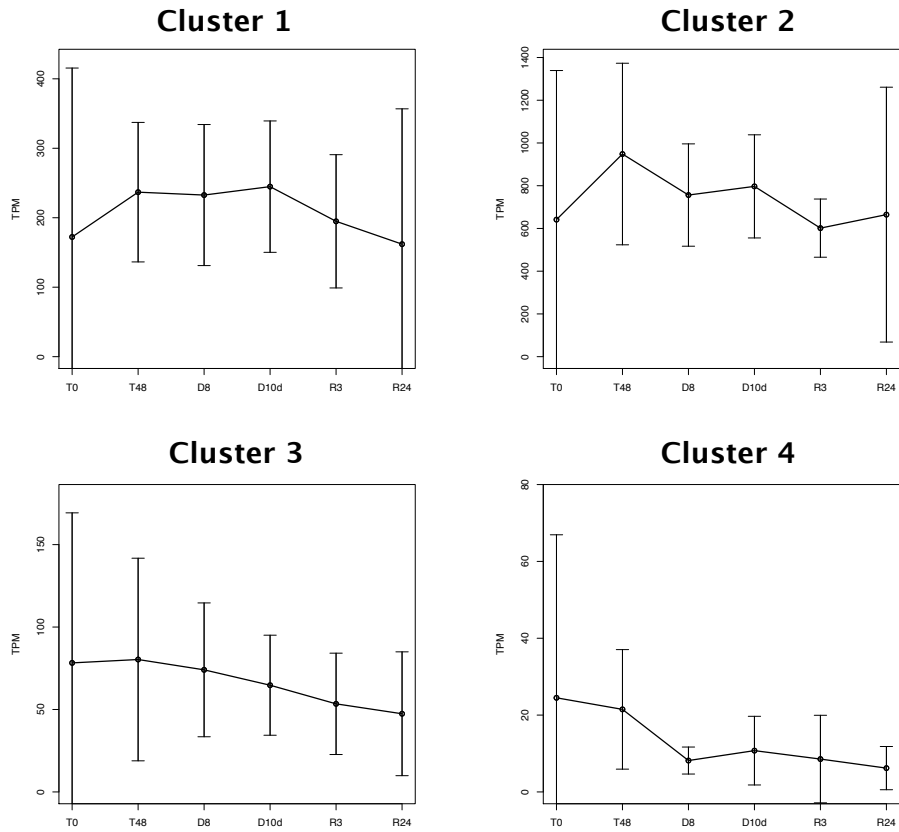

**Supplementary Figure S3.** Time course of the expression of DEGs annotated by GO:0008152 (metabolic process) (mean  $\pm$  SD).

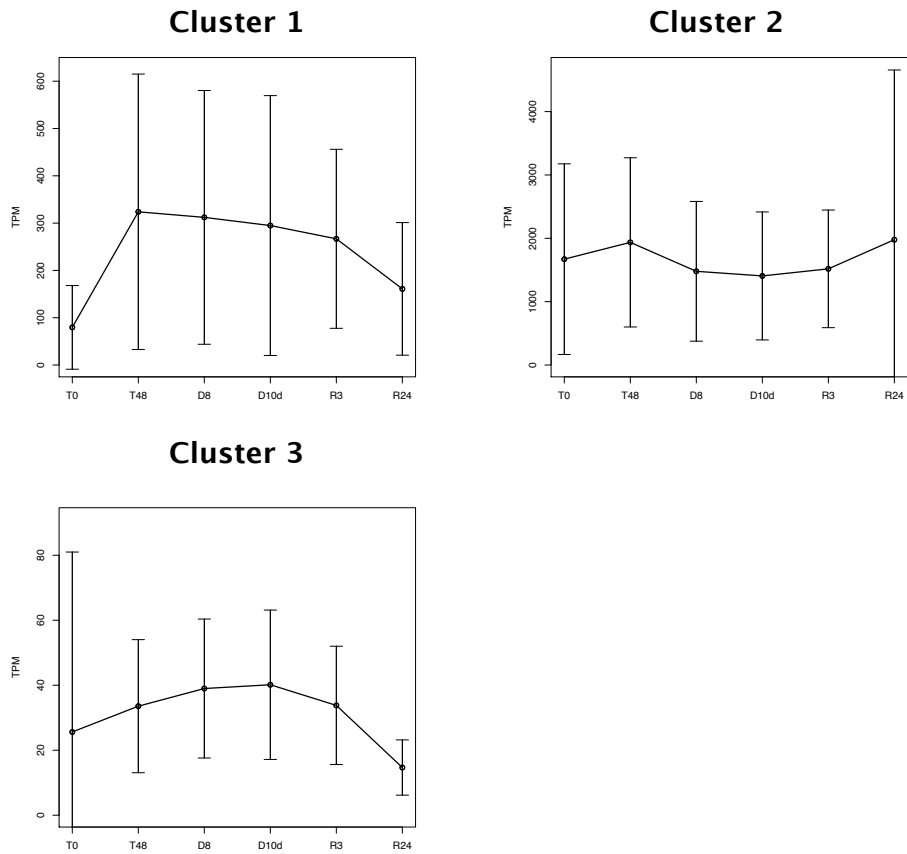

**Supplementary Figure S4.** Time course of the expression of DEGs annotated by GO:0055114 (oxidation-reduction process) (mean  $\pm$  SD).

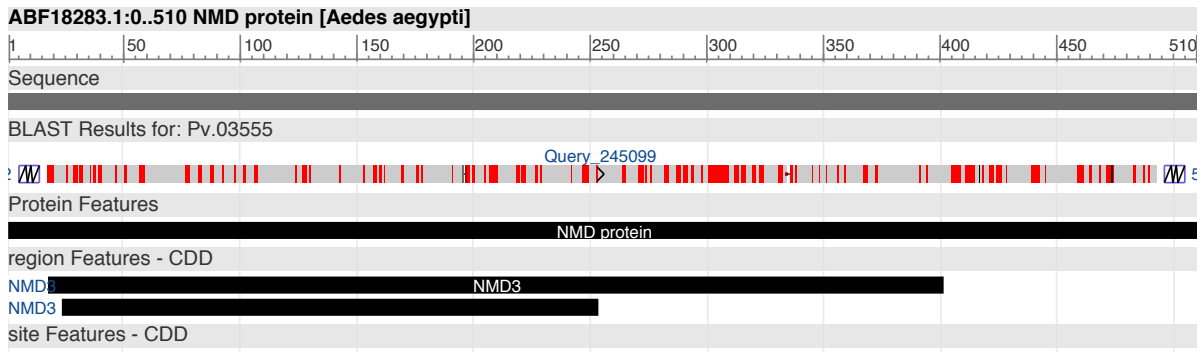

**Supplementary Figure S5.** Alignment of Pv.03555 with nonsense-mediated mRNA decay (NMD) protein. The visualization was created by using MSASviewer (<https://www.ncbi.nlm.nih.gov/projects/msaviewer/>). Sequence: sequence of the subject gene; Blast Results: alignment results between the *P. vanderplanki* gene and the subject gene by BLASTX; Protein Features, specific regions of the proteins; region Features, specific regions of the subject gene; site Features, specific sites of the subject gene. Under BLAST Results, gaps are represented as thick, dark-red, horizontal lines; insertions as black vertical bars and black arrowheads; and aligned regions as grey bars (match regions) or red bars (mismatch regions). The regions and sites of the subject gene that overlapped with those of the aligned *P. vanderplanki* gene were considered present.

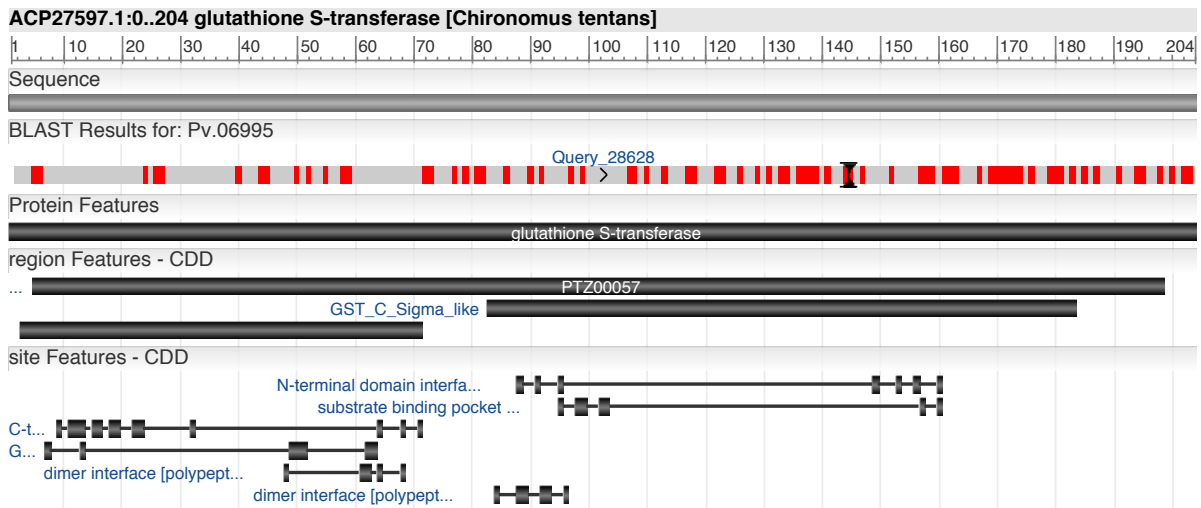

**Supplementary Figure S6.** Alignment of Pv.06995 with glutathione S-transferase.

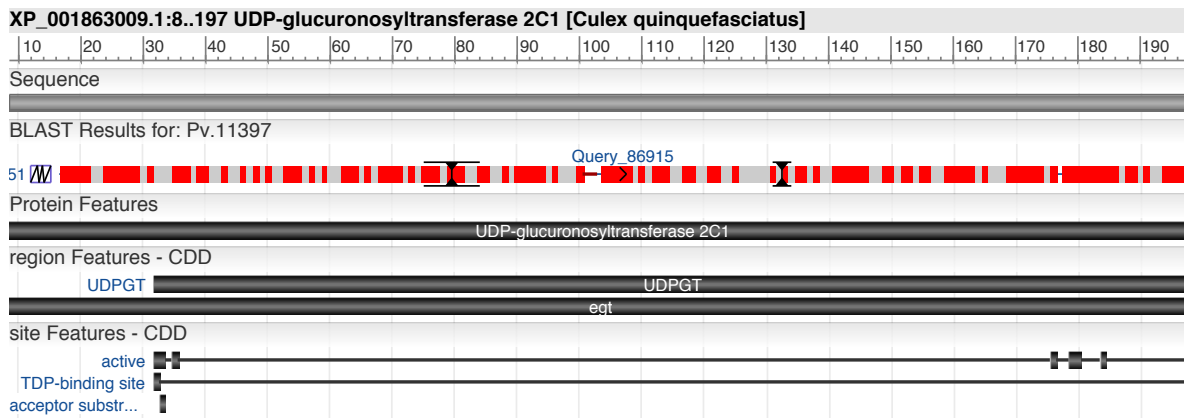

**Supplementary Figure S7.** Alignment of Pv.11397 with UDP-glucuronosyltransferase 2C1.

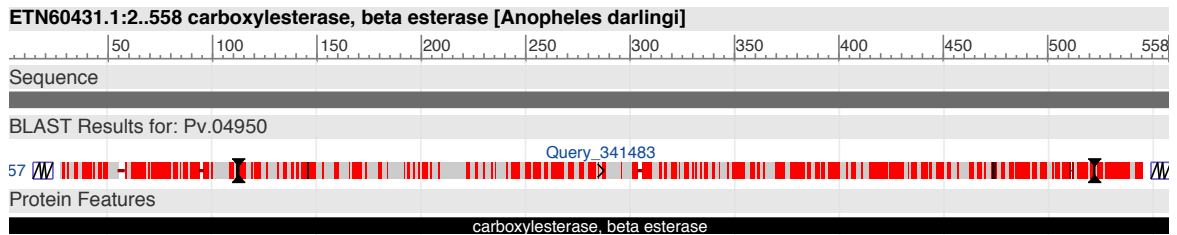

**Supplementary Figure S8.** Alignment of Pv.04950 with carboxylesterase, beta esterase.

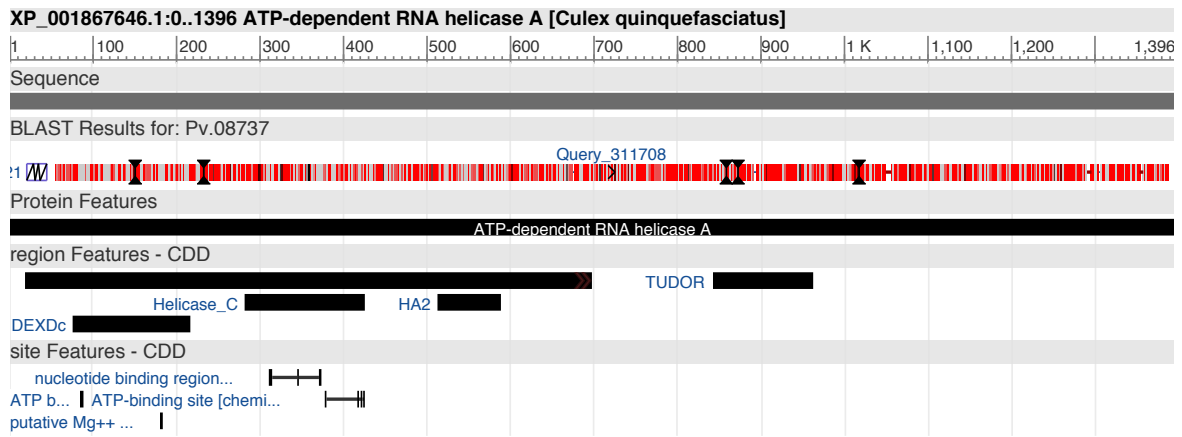

**Supplementary Figure S9.** Alignment of Pv.08737 with ATP-dependent RNA helicase A.

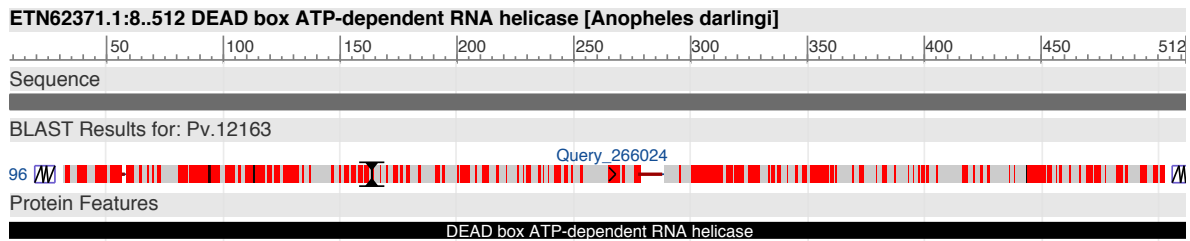

**Supplementary Figure S10.** Alignment of Pv.12163 with DEAD-box ATP-dependent RNA helicase.



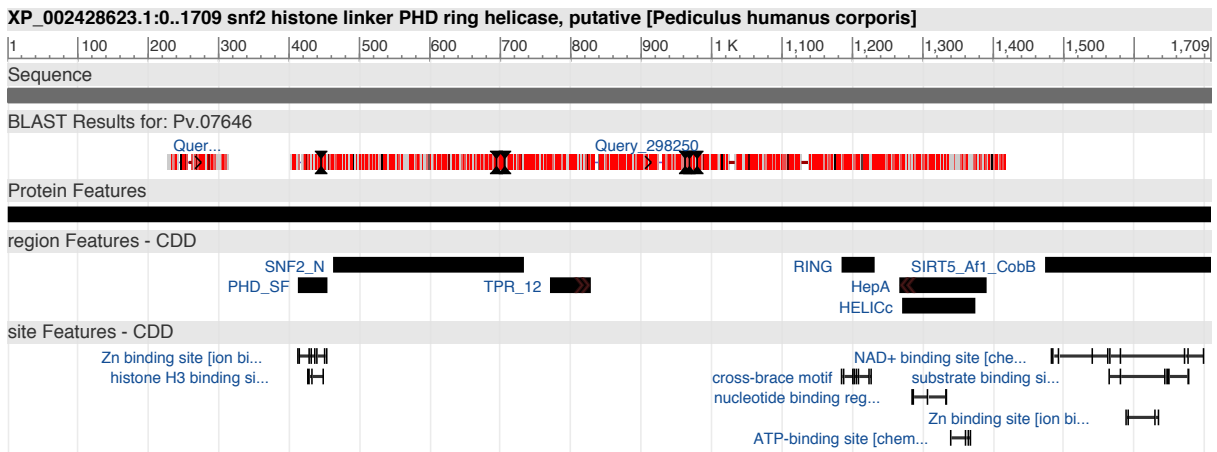

**Supplementary Figure S11.** Alignment of Pv.07646 with SNF2 histone linker PHD-ring helicase, annotated as putatively involved in desuccinylation.

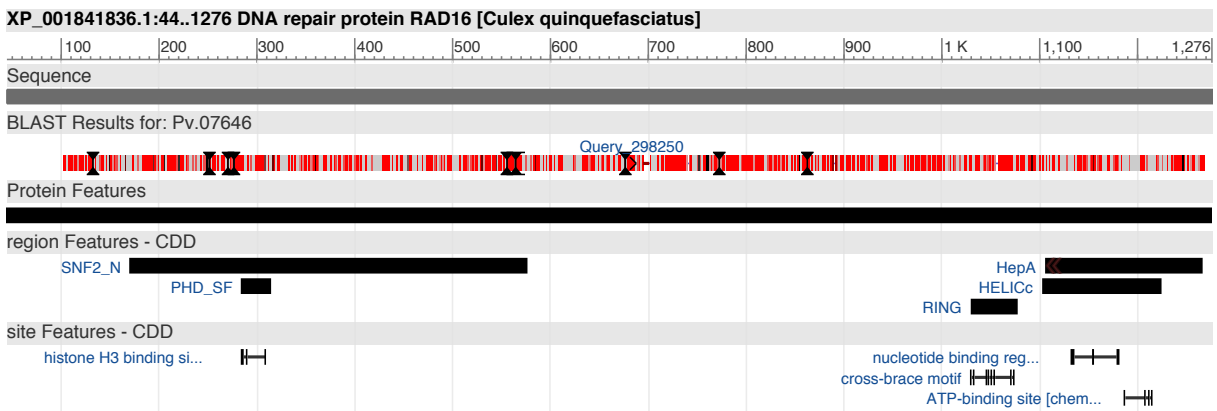

**Supplementary Figure S12.** Alignment Pv.07646 with the DNA-repair protein RAD16.

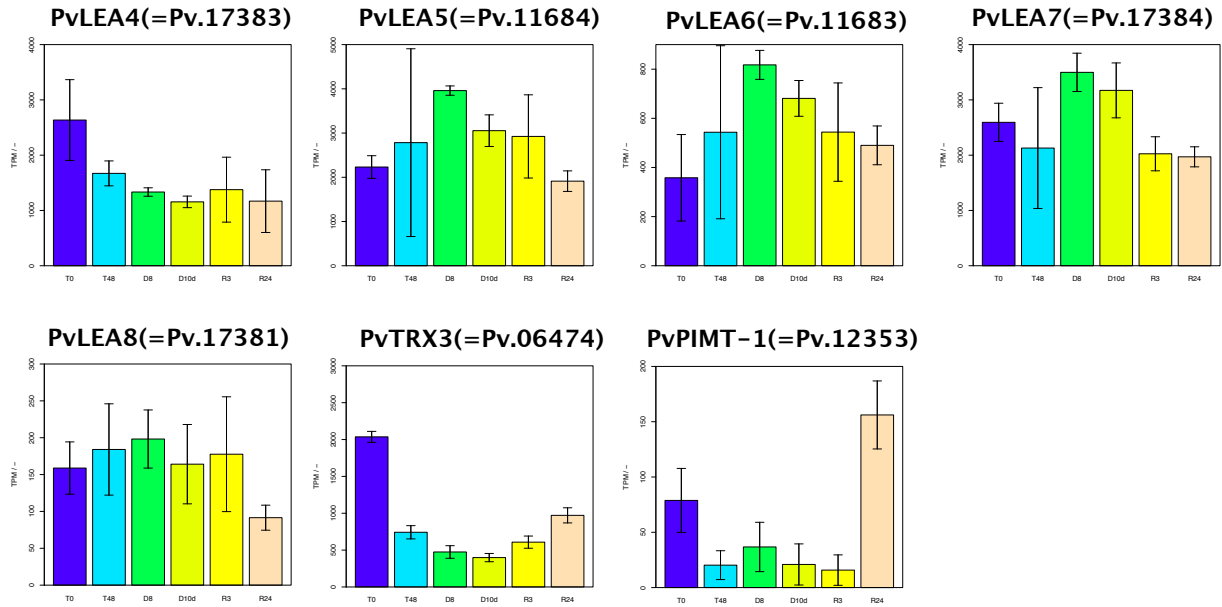

**Supplementary Figure S13.** Time course expression of the genes encoding late embryogenesis abundant proteins (LEA), thioredoxin (TRX), and protein L-isoaspartyl methyltransferase (PIMT) genes.

**Supplementary Table S1.** DEGs between D10d and R3.

|                     | PvGene ID | Gene Identifier | BLAST first hit gene                    | E.value   |
|---------------------|-----------|-----------------|-----------------------------------------|-----------|
| Upregulated in R3   | Pv.04891  | 194753680       | GF12734                                 | 1.71E-9   |
|                     | Pv.07646  | 170027903       | DNA repair protein RAD16                | 0.0       |
|                     | Pv.01911  | 765338102       | AAEL005023-PA                           | 1.17E-56  |
|                     | Pv.00327  | 170050025       | conserved hypothetical protein          | 2.20E-61  |
|                     | Pv.08602  | 668455465       | AGAP001139-PA-like protein              | 3.67E-102 |
|                     | Pv.01867  | 157136676       | AAEL013609-PA, partial                  | 0.0       |
|                     | Pv.03099  |                 | No Hits                                 |           |
| Downregulated in R3 | Pv.04558  | 170036404       | conserved hypothetical protein          | 2.62E-107 |
|                     | Pv.08152  |                 | No Hits                                 |           |
|                     | Pv.11244  | 157128927       | AAEL011272-PA, partial                  | 2.15E-126 |
|                     | Pv.13360  | 170052229       | FAM96B                                  | 7.93E-77  |
|                     | Pv.05172  | 157104834       | AAEL004151-PB                           | 4.96E-25  |
|                     | Pv.13909  | 751792306       | PREDICTED: Y+L amino acid transporter 2 | 0.0       |
|                     | Pv.10501  | 170050626       | cyclin b                                | 1.49E-109 |

**Supplementary Table S2.** Annotated gene ontology to the DEGs identified between D10d and R3.

| Pv Gene ID | Annotated GO                                                                                                                                                         | GO Description                                                                                                                                                                                                                                                                                                                                                                                     | Pv Gene ID | Annotated GO                                                                                                                                                                                                                                                                                                                                                                                                                                                                                                                                                                                                                                                                                                                                                                                                                                                                                                                                                                  | GO Description                                                                                                                                                                                                                                                                                            |                                                                                                                                                                                                                                                                                                                                                                                            |  |
|------------|----------------------------------------------------------------------------------------------------------------------------------------------------------------------|----------------------------------------------------------------------------------------------------------------------------------------------------------------------------------------------------------------------------------------------------------------------------------------------------------------------------------------------------------------------------------------------------|------------|-------------------------------------------------------------------------------------------------------------------------------------------------------------------------------------------------------------------------------------------------------------------------------------------------------------------------------------------------------------------------------------------------------------------------------------------------------------------------------------------------------------------------------------------------------------------------------------------------------------------------------------------------------------------------------------------------------------------------------------------------------------------------------------------------------------------------------------------------------------------------------------------------------------------------------------------------------------------------------|-----------------------------------------------------------------------------------------------------------------------------------------------------------------------------------------------------------------------------------------------------------------------------------------------------------|--------------------------------------------------------------------------------------------------------------------------------------------------------------------------------------------------------------------------------------------------------------------------------------------------------------------------------------------------------------------------------------------|--|
| Pv.04891   | GO:0016301<br>GO:0016310                                                                                                                                             | kinase activity<br>phosphorylation                                                                                                                                                                                                                                                                                                                                                                 | Pv.01867   | GO:0005886<br>GO:0012505<br>GO:0015279<br>GO:0048763<br>GO:0002115<br>GO:0007155<br>GO:0007476<br>GO:0022416<br>GO:0032237                                                                                                                                                                                                                                                                                                                                                                                                                                                                                                                                                                                                                                                                                                                                                                                                                                                    | plasma membrane<br>endomembrane system<br>store-operated calcium channel activity<br>calcium-induced calcium release activity<br>store-operated calcium entry<br>cell adhesion<br>imaginal disc-derived wing morphogenesis<br>chaeta development<br>activation of store-operated calcium channel activity |                                                                                                                                                                                                                                                                                                                                                                                            |  |
| Pv.00327   | GO:0000166<br>GO:0003676<br>GO:0016779<br>GO:0046872<br>GO:0008152                                                                                                   | nucleotide binding<br>nucleic acid binding<br>nucleotidyltransferase activity<br>metal ion binding<br>metabolic process                                                                                                                                                                                                                                                                            |            | GO:0051533                                                                                                                                                                                                                                                                                                                                                                                                                                                                                                                                                                                                                                                                                                                                                                                                                                                                                                                                                                    | positive regulation of NFAT protein import into nucleus                                                                                                                                                                                                                                                   |                                                                                                                                                                                                                                                                                                                                                                                            |  |
| Pv.08602   | GO:0005634<br>GO:0005762                                                                                                                                             | nucleus<br>mitochondrial large ribosomal subunit                                                                                                                                                                                                                                                                                                                                                   |            | Pv.11244                                                                                                                                                                                                                                                                                                                                                                                                                                                                                                                                                                                                                                                                                                                                                                                                                                                                                                                                                                      | GO:0017146<br>GO:0004972                                                                                                                                                                                                                                                                                  | NMDA selective glutamate receptor complex<br>NMDA glutamate receptor activity                                                                                                                                                                                                                                                                                                              |  |
|            | GO:0003676                                                                                                                                                           | nucleic acid binding                                                                                                                                                                                                                                                                                                                                                                               |            | Pv.13360                                                                                                                                                                                                                                                                                                                                                                                                                                                                                                                                                                                                                                                                                                                                                                                                                                                                                                                                                                      | GO:0005737<br>GO:0007059<br>GO:0016226                                                                                                                                                                                                                                                                    | cytoplasm<br>chromosome segregation<br>iron-sulfur cluster assembly                                                                                                                                                                                                                                                                                                                        |  |
|            | GO:0003735<br>GO:0008270<br>GO:0006412                                                                                                                               | structural constituent of ribosome<br>zinc ion binding<br>translation                                                                                                                                                                                                                                                                                                                              |            | Pv.05172                                                                                                                                                                                                                                                                                                                                                                                                                                                                                                                                                                                                                                                                                                                                                                                                                                                                                                                                                                      | GO:0022625<br>GO:0003682<br>GO:0003735<br>GO:0006412                                                                                                                                                                                                                                                      | cytosolic large ribosomal subunit<br>chromatin binding<br>structural constituent of ribosome<br>translation                                                                                                                                                                                                                                                                                |  |
| Pv.07646   | GO:0000786<br>GO:0005634<br>GO:0003677<br>GO:0004386<br>GO:0004842<br>GO:0005524<br>GO:0008270<br>GO:0016874<br>GO:0036054<br>GO:0036055<br>GO:0070403<br>GO:0000209 | nucleosome<br>nucleus<br>DNA binding<br>helicase activity<br>ubiquitin-protein transferase activity<br>ATP binding<br>zinc ion binding<br>ligase activity<br>protein-malonyllysine demalonylase activity<br>protein-succinyllysine desuccinylase activity<br>NAD+ binding<br>protein polyubiquitination                                                                                            |            | Pv.13909                                                                                                                                                                                                                                                                                                                                                                                                                                                                                                                                                                                                                                                                                                                                                                                                                                                                                                                                                                      | GO:0016021<br>GO:0015171<br>GO:0003333<br>GO:0060356                                                                                                                                                                                                                                                      | integral component of membrane<br>amino acid transmembrane transporter activity<br>amino acid transmembrane transport<br>leucine import                                                                                                                                                                                                                                                    |  |
|            | GO:0006334<br>GO:0022008<br>GO:0036047<br>GO:0036049                                                                                                                 | nucleosome assembly<br>neurogenesis<br>peptidyl-lysine demalonylation<br>peptidyl-lysine desuccinylation                                                                                                                                                                                                                                                                                           |            | Pv.10501                                                                                                                                                                                                                                                                                                                                                                                                                                                                                                                                                                                                                                                                                                                                                                                                                                                                                                                                                                      | GO:0000775<br>GO:0019908<br><br>GO:0045495<br>GO:0051233<br>GO:0072686<br>GO:0016538                                                                                                                                                                                                                      | chromosome, centromeric region<br>nuclear cyclin-dependent protein kinase holoenzyme complex<br>pole plasm<br>spindle midzone<br>mitotic spindle<br>cyclin-dependent protein serine/threonine kinase regulator activity                                                                                                                                                                    |  |
|            | Pv.01911                                                                                                                                                             | GO:0005794<br>GO:0016021<br>GO:0003676<br>GO:0008270<br><br>GO:0019706<br>GO:0006888<br><br>GO:0018345                                                                                                                                                                                                                                                                                             |            | Golgi apparatus<br>integral component of membrane<br>nucleic acid binding<br>zinc ion binding<br><br>protein-cysteine S-palmitoyltransferase activity<br>ER to Golgi vesicle-mediated transport<br><br>protein palmitoylation                                                                                                                                                                                                                                                                                                                                                                                                                                                                                                                                                                                                                                                                                                                                                 | GO:0000086<br>GO:0000281<br>GO:0000920<br>GO:0001700<br><br>GO:0006974<br>GO:0007079<br><br>GO:0008608<br>GO:0035186<br>GO:0035561                                                                                                                                                                        | G2/M transition of mitotic cell cycle<br>mitotic cytokinesis<br>cell separation after cytokinesis<br>embryonic development via the syncytial blastoderm<br>cellular response to DNA damage stimulus<br>mitotic chromosome movement towards spindle pole<br>attachment of spindle microtubules to kinetochore<br>syncytial blastoderm mitotic cell cycle<br>regulation of chromatin binding |  |
|            | Pv.04558                                                                                                                                                             | GO:0005826<br>GO:0016324<br>GO:0016328<br>GO:0030478<br>GO:0045178<br>GO:0045179<br>GO:0005089<br>GO:0019992<br>GO:0046872<br>GO:0007015<br>GO:0007277<br>GO:0007349<br>GO:0007370<br>GO:0007374<br>GO:0007375<br>GO:0007377<br>GO:0016476<br>GO:0030589<br><br>GO:0031532<br>GO:0035025<br><br>GO:0035277<br>GO:0035556<br>GO:0038032<br><br>GO:0043547<br>GO:0050770<br>GO:0070252<br>GO:0090254 |            | actomyosin contractile ring<br>apical plasma membrane<br>lateral plasma membrane<br>actin cap<br>basal part of cell<br>apical cortex<br>Rho guanyl-nucleotide exchange factor activity<br>diacylglycerol binding<br>metal ion binding<br>actin filament organization<br>pole cell development<br>cellularization<br>ventral furrow formation<br>posterior midgut invagination<br>anterior midgut invagination<br>germ-band extension<br>regulation of embryonic cell shape<br>pseudocleavage involved in syncytial blastoderm formation<br>actin cytoskeleton reorganization<br>positive regulation of Rho protein signal transduction<br>spiracle morphogenesis, open tracheal system<br>intracellular signal transduction<br>termination of G-protein coupled receptor signaling pathway<br>positive regulation of GTPase activity<br>regulation of axonogenesis<br>actin-mediated cell contraction<br>cell elongation involved in imaginal disc-derived wing morphogenesis |                                                                                                                                                                                                                                                                                                           |                                                                                                                                                                                                                                                                                                                                                                                            |  |

**Supplementary Table S3.** Differentially expressed genes between T0 and T48 with GO:0008152 (metabolic process). PREDICTED, initial RefSeq record status meaning the annotation is only predicted by automated BLAST analysis and has not been validated experimentally.

| Cluster Num. | Pv Gene ID | Gene Identifier | BLAST First Hit Gene                                          | E-value    |
|--------------|------------|-----------------|---------------------------------------------------------------|------------|
| Cluster 1    | Pv.00012   | 755889065       | PREDICTED: uncharacterized protein LOC101899881 isoform X2    | 3.5155E-21 |
|              | Pv.00503   | 170031381       | conserved hypothetical protein                                | 0.0        |
|              | Pv.01170   | 195109112       | GI23236                                                       | 0.0        |
|              | Pv.01614   | 557775558       | PREDICTED: tubulin beta-1 chain                               | 0.0        |
|              | Pv.01749   | 158296880       | AGAP008252-PA                                                 | 0.0        |
|              | Pv.01933   | 755849759       | PREDICTED: GTP-binding protein 1-like                         | 0.0        |
|              | Pv.03555   | 94468868        | NMD protein                                                   | 0.0        |
|              | Pv.05750   | 347969792       | AGAP003372-PB                                                 | 8.73E-102  |
|              | Pv.06865   | 157120582       | AAEL009068-PA                                                 | 0.0        |
|              | Pv.07614   | 568250312       | transport and golgi family organization                       | 2.44E-75   |
|              | Pv.07843   | 668455678       | hypothetical protein ZHAS_00011763                            | 4.90E-162  |
|              | Pv.08737   | 170064729       | ATP-dependent RNA helicase A                                  | 0.0        |
|              | Pv.11162   | 668458368       | AGAP004610-PA-like protein                                    | 0.0        |
|              | Pv.12163   | 568253176       | DEAD box ATP-dependent RNA helicase                           | 3.32E-146  |
|              | Pv.13802   | 170049985       | conserved hypothetical protein                                | 2.60E-86   |
|              | Pv.15605   | 157107882       | AAEL014906-PA, partial                                        | 2.81E-76   |
|              | Pv.17087   | 817062658       | PREDICTED: E3 ubiquitin-protein ligase rnf146-like            | 1.19E-32   |
| Cluster 2    | Pv.02231   | 751789335       | PREDICTED: 5-oxoprolinase                                     | 0.0        |
|              | Pv.06995   | 227343489       | glutathione S-transferase                                     | 5.64E-87   |
|              | Pv.10576   | 347969074       | AGAP003018-PA                                                 | 0.0        |
|              | Pv.12167   | 157110933       | AAEL000854-PA                                                 | 9.32E-141  |
| Cluster 3    | Pv.02391   | 749772182       | PREDICTED: abhydrolase domain-containing protein 4 isoform X1 | 9.38E-112  |
|              | Pv.06862   | 568250143       | Elongator complex protein 3                                   | 0.0        |
|              | Pv.08047   | 332373216       | unknown                                                       | 8.53E-36   |
|              | Pv.11397   | 170054183       | UDP-glucuronosyltransferase 2C1                               | 8.03E-30   |
|              | Pv.12035   | 157117142       | AAEL007889-PA                                                 | 0.0        |
|              | Pv.13081   | 157136208       | AAEL003433-PA                                                 | 0.0        |
|              | Pv.13347   | 557763449       | PREDICTED: E3 ubiquitin-protein ligase Topors isoform X2      | 3.02E-56   |
|              | Pv.16072   | 668446285       | AGAP008326-PA-like protein                                    | 1.05E-145  |
| Cluster 3    | Pv.04950   | 568250792       | carboxylesterase, beta esterase                               | 1.67E-138  |
|              | Pv.06833   | 589278470       | hypothetical protein TREMEDRAFT_39272                         | 7.49E-26   |
|              | Pv.13234   | 668450732       | hypothetical protein ZHAS_00007358                            | 1.72E-28   |

**Supplementary Table S4.** Differentially expressed genes between T0 and T48 with GO:0055114 (oxidation-reduction process).

| Cluster Num. | Pv Gene ID | Gene Identifier | BLAST First Hit Gene                                         | E-value   |
|--------------|------------|-----------------|--------------------------------------------------------------|-----------|
| Cluster 1    | Pv.00927   | 646723765       | hypothetical protein L798_06909                              | 2.76E-50  |
|              | Pv.02233   | 157115285       | AAEL001183-PA                                                | 4.90E-121 |
|              | Pv.02556   | 568253142       | augmenter of liver regeneration                              | 1.03E-70  |
|              | Pv.03565   | 170049364       | cytochrome P450                                              | 2.25E-162 |
|              | Pv.03626   | 157123150       | AAEL009396-PA                                                | 6.56E-86  |
|              | Pv.03974   | 157124708       | AAEL001860-PA                                                | 1.28E-16  |
|              | Pv.05128   | 568248619       | hypothetical protein AND_009968                              | 4.30E-154 |
|              | Pv.05617   | 262410959       | ferritin heavy chain-like protein                            | 6.71E-100 |
|              | Pv.05897   | 157112413       | AAEL006129-PA                                                | 9.68E-144 |
|              | Pv.08902   | 304367635       | catalase                                                     | 0.0       |
|              | Pv.10292   | 751781624       | PREDICTED: dehydrogenase/reductase SDR family member 11-like | 1.70E-66  |
|              | Pv.12828   | 157132840       | AAEL002901-PA                                                | 3.11E-87  |
|              | Pv.12949   | 766940976       | PREDICTED: superoxide dismutase                              | 5.00E-64  |
|              | Pv.15455   | 157132518       | AAEL012457-PA                                                | 1.20E-142 |
| Cluster 2    | Pv.05587   | 584594454       | cytochrome P450 6FV2                                         | 0.0       |
|              | Pv.05872   | 157111212       | AAEL005790-PA                                                | 0.0       |
|              | Pv.06474   | 528744594       | thioredoxin                                                  | 5.87E-91  |
|              | Pv.07012   | 157137514       | AAEL003645-PA                                                | 1.56E-101 |
| Cluster 3    | Pv.00404   | 528744570       | thioredoxin                                                  | 1.20E-90  |
|              | Pv.01417   | 584594454       | cytochrome P450 6FV2                                         | 0.0       |
|              | Pv.01758   | 157130887       | AAEL002658-PB                                                | 1.04E-92  |
|              | Pv.04458   | 347967826       | AGAP002418-PA                                                | 5.58E-129 |
|              | Pv.07504   | 528744568       | thioredoxin                                                  | 7.07E-77  |
|              | Pv.07510   | 528744554       | thioredoxin, partial                                         | 3.38E-95  |
|              | Pv.08589   | 157135753       | AAEL013389-PA                                                | 0.0       |
|              | Pv.10571   | 157118100       | AAEL008160-PA                                                | 0.0       |

**Supplementary Table S5.** Preprocessing and mapping. Samples were prepared in biological triplicate. totalSequences, number of sequenced reads; tooShort, number of reads shorter than 14 base pairs; tooManyN, number of reads containing more than 2 N bases; totalPassed, tooShort and tooManyN subtracted from totalSequences; mapped, number of reads mapped to the *P. vanderplanki* genome; unmapped, number of reads not mapped to the same genome; MappingRate, proportion of mapped reads among all passed reads.

|              | Preprocess Result |          |          |             | Mapping Result |          |             |
|--------------|-------------------|----------|----------|-------------|----------------|----------|-------------|
|              | totalSequences    | tooShort | tooManyN | totalPassed | mapped         | unmapped | MappingRate |
| T0-Sample1   | 9329152           | 1089685  | 33       | 8239434     | 1682490        | 6556944  | 20.4        |
| T0-Sample2   | 8618767           | 1642930  | 23       | 6975814     | 2463740        | 4512074  | 35.3        |
| T0-Sample3   | 5486398           | 1002516  | 12       | 4483870     | 1517136        | 2966734  | 33.8        |
| T48-Sample1  | 8249645           | 907419   | 27       | 7342199     | 1282918        | 6059281  | 17.5        |
| T48-Sample2  | 4527055           | 923602   | 9        | 3603444     | 1340121        | 2263323  | 37.2        |
| T48-Sample3  | 5862177           | 1172255  | 20       | 4689902     | 1747773        | 2942129  | 37.3        |
| D8-Sample1   | 7162127           | 867901   | 23       | 6294203     | 1263235        | 5030968  | 20.1        |
| D8-Sample2   | 5497776           | 914899   | 15       | 4582862     | 1384844        | 3198018  | 30.2        |
| D8-Sample3   | 4710977           | 789877   | 19       | 3921081     | 1214370        | 2706711  | 31.0        |
| D10d-Sample1 | 9786341           | 972550   | 49       | 8813742     | 1410369        | 7403373  | 16.0        |
| D10d-Sample2 | 5046272           | 887863   | 13       | 4158396     | 1358339        | 2800057  | 32.7        |
| D10d-Sample3 | 6176969           | 1146552  | 21       | 5030396     | 1716458        | 3313938  | 34.1        |
| R3-Sample1   | 2269038           | 431391   | 3        | 1837644     | 687580         | 1150064  | 37.4        |
| R3-Sample2   | 1966504           | 340563   | 6        | 1625935     | 533487         | 1092448  | 32.8        |
| R3-Sample3   | 4409262           | 614660   | 6        | 3794596     | 1188580        | 2606016  | 31.3        |
| R24-Sample1  | 3580658           | 819575   | 8        | 2761075     | 1228917        | 1532158  | 44.5        |
| R24-Sample2  | 5913507           | 1330397  | 16       | 4583094     | 2078353        | 2504741  | 45.3        |
| R24-Sample3  | 5071881           | 1122334  | 14       | 3949533     | 1752922        | 2196611  | 44.4        |
